# Supplementary material
Source: Springer Nature journal article supplement (https://www.springermedizin.de/resource/supplementary/12884_2012_686_MOESM2_ESM.pdf/9458298)
Supplement: MOESM2 [file 9458298]

**Study Code (ID)**

**%  
RR (95% CI) Weight**

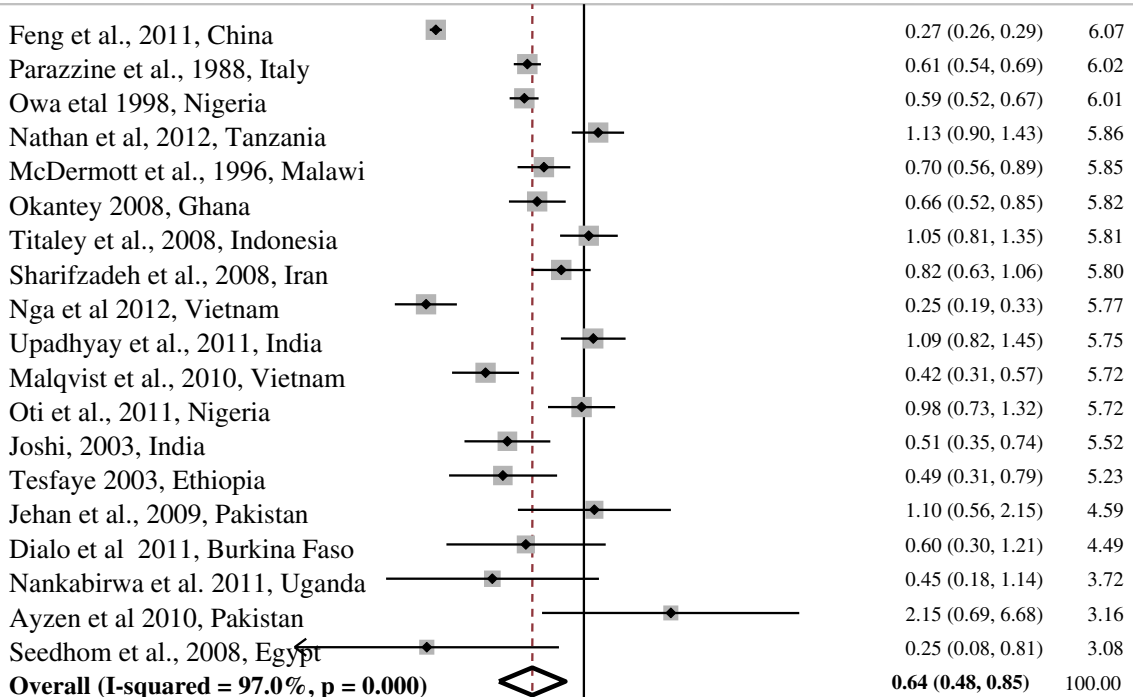

NOTE: Weights are from random effects analysis

.0786

1

12.7

*Health facility delivery reduces neonatal mortality*

*Health facility delivery increases neonatal mortality*
